# Supplementary material
Source: PubMed Central journal article supplement (PMC7232986)
Supplement: NIHMS1581184-supplement-Supporting_Information.pdf [file NIHMS1581184-supplement-Supporting_Information.pdf]

## SUPPORTING INFORMATION

# Super-resolution reconstruction for two and three-dimensional LA-ICP-MS bio-imaging

Mika T. Westerhausen<sup>a</sup>, David P. Bishop<sup>a</sup>, Annette Dowd<sup>b</sup>, Jonathan Wanagat<sup>c</sup>, Nerida Cole<sup>d</sup> & Philip A. Doble<sup>a\*</sup>

- a. The Atomic Medicine Initiative, School of Mathematical and Physical Sciences, University of Technology Sydney, Broadway, NSW, 2007, Australia
- b. School of Mathematical and Physical Sciences, University of Technology Sydney, Broadway NSW, 2007, Australia
- c. Department of Medicine, Division of Geriatrics, David Geffen School of Medicine, University of California, Los Angeles, CA, USA
- d. Faculty of Science, Engineering & Technology Swinburne University of Technology, John Street, Hawthorn, Victoria, 3122, Australia

### TABLE OF CONTENTS

|                                                                                            |                                     |
|--------------------------------------------------------------------------------------------|-------------------------------------|
| Table S1: Concentrations of gelatin standards.....                                         | 2                                   |
| Table S2: Concentrations of aqueous standards.....                                         | 2                                   |
| Table S3: Analytical figures of merit after application of the processing algorithms. .... | 3                                   |
| Table S4: Average Response and % RSD for calibration standard near or above the LOQ. ....  | 3                                   |
| Table S5: Average concentrations and % RSD for simulated two-layer sample.....             | 4                                   |
| Figure S1: Representative calibration curves and image panels.....                         | 5                                   |
| Figure S2: Post ablation raster pattern.....                                               | 6                                   |
| Figure S3: Effect of image processing on two-layer test.....                               | <b>Error! Bookmark not defined.</b> |

Table S1: Concentrations of gelatin standards.

| <b>Standard</b> | <b>Gd (ng.g<sup>-1</sup>)</b> |
|-----------------|-------------------------------|
| Blank           | 1.3±0.1                       |
| 1               | 16.2±0.2                      |
| 2               | 61.2±0.4                      |
| 3               | 241.0±2                       |
| 4               | 893.0±5                       |
| 5               | 3523.0±14                     |

Table S2: Concentrations of aqueous standards.

| <b>Standard</b> | <b>Gd (ng.g<sup>-1</sup>)</b> |
|-----------------|-------------------------------|
| Blank           | 0.00                          |
| 1               | 0.29                          |
| 2               | 1.17                          |
| 3               | 4.69                          |
| 4               | 18.8                          |
| 5               | 75.0                          |
| 6               | 300                           |

Table S3: Analytical figures of merit after application of the processing algorithms.

|                   | <b>Gradient<br/>(CPS/ng.g<sup>-1</sup>)</b> | <b>Intercept<br/>(CPS)</b> | <b>Linearity<br/>(r<sup>2</sup>)</b> | <b>LOD<br/>(ng.g<sup>-1</sup>)</b> | <b>LOQ<br/>(ng.g<sup>-1</sup>)</b> |
|-------------------|---------------------------------------------|----------------------------|--------------------------------------|------------------------------------|------------------------------------|
| <b>Horizontal</b> | 0.1433                                      | 2.4                        | 0.9996                               | 72                                 | 219                                |
| <b>Vertical</b>   | 0.1237                                      | 2.0                        | 0.9994                               | 82                                 | 248                                |
| <b>Summed</b>     | 0.2670                                      | 4.4                        | 0.9995                               | 77                                 | 234                                |
| <b>SRR</b>        | 0.2659                                      | 12.1                       | 0.9993                               | 89                                 | 270                                |
| <b>Gaussian</b>   | 0.2657                                      | 12.1                       | 0.9993                               | 91                                 | 275                                |
| <b>RLTV</b>       | 0.2673                                      | 11.3                       | 0.9993                               | 94                                 | 285                                |

Table S4: Average Response and % RSD for calibration standard near or above the LOQ.

|                 | <b>Standard 4</b>                     |             |
|-----------------|---------------------------------------|-------------|
|                 | <b>Average<br/>Response<br/>(CPS)</b> | <b>%RSD</b> |
| <b>Summed</b>   | 86                                    | 44          |
| <b>SRR</b>      | 93                                    | 36          |
| <b>Gaussian</b> | 93                                    | 24          |
| <b>RLTV</b>     | 92                                    | 36          |
|                 | <b>Standard 5</b>                     |             |
|                 | <b>Average<br/>Response<br/>(CPS)</b> | <b>%RSD</b> |
| <b>Summed</b>   | 221                                   | 31          |
| <b>SRR</b>      | 230                                   | 24          |
| <b>Gaussian</b> | 230                                   | 16          |
| <b>RLTV</b>     | 228                                   | 26          |
|                 | <b>Standard 6</b>                     |             |
|                 | <b>Average<br/>Response<br/>(CPS)</b> | <b>%RSD</b> |
| <b>Summed</b>   | 897                                   | 23          |
| <b>SRR</b>      | 952                                   | 14          |
| <b>Gaussian</b> | 952                                   | 11          |
| <b>RLTV</b>     | 958                                   | 20          |

Table S5: Average concentrations and % RSD for simulated two-layer sample.

| <b>Layer</b>      | <b>Gd (ng.g<sup>-1</sup>)</b> | <b>% RSD</b> |
|-------------------|-------------------------------|--------------|
| <b>Horizontal</b> | 690                           | 110          |
| <b>Vertical</b>   | 690                           | 110          |
| <b>Summed</b>     | 690                           | 110          |
| <b>SRR</b>        | 756                           | 70           |
| <b>Gaussian</b>   | 756                           | 58           |
| <b>RLTV</b>       | 772                           | 86           |

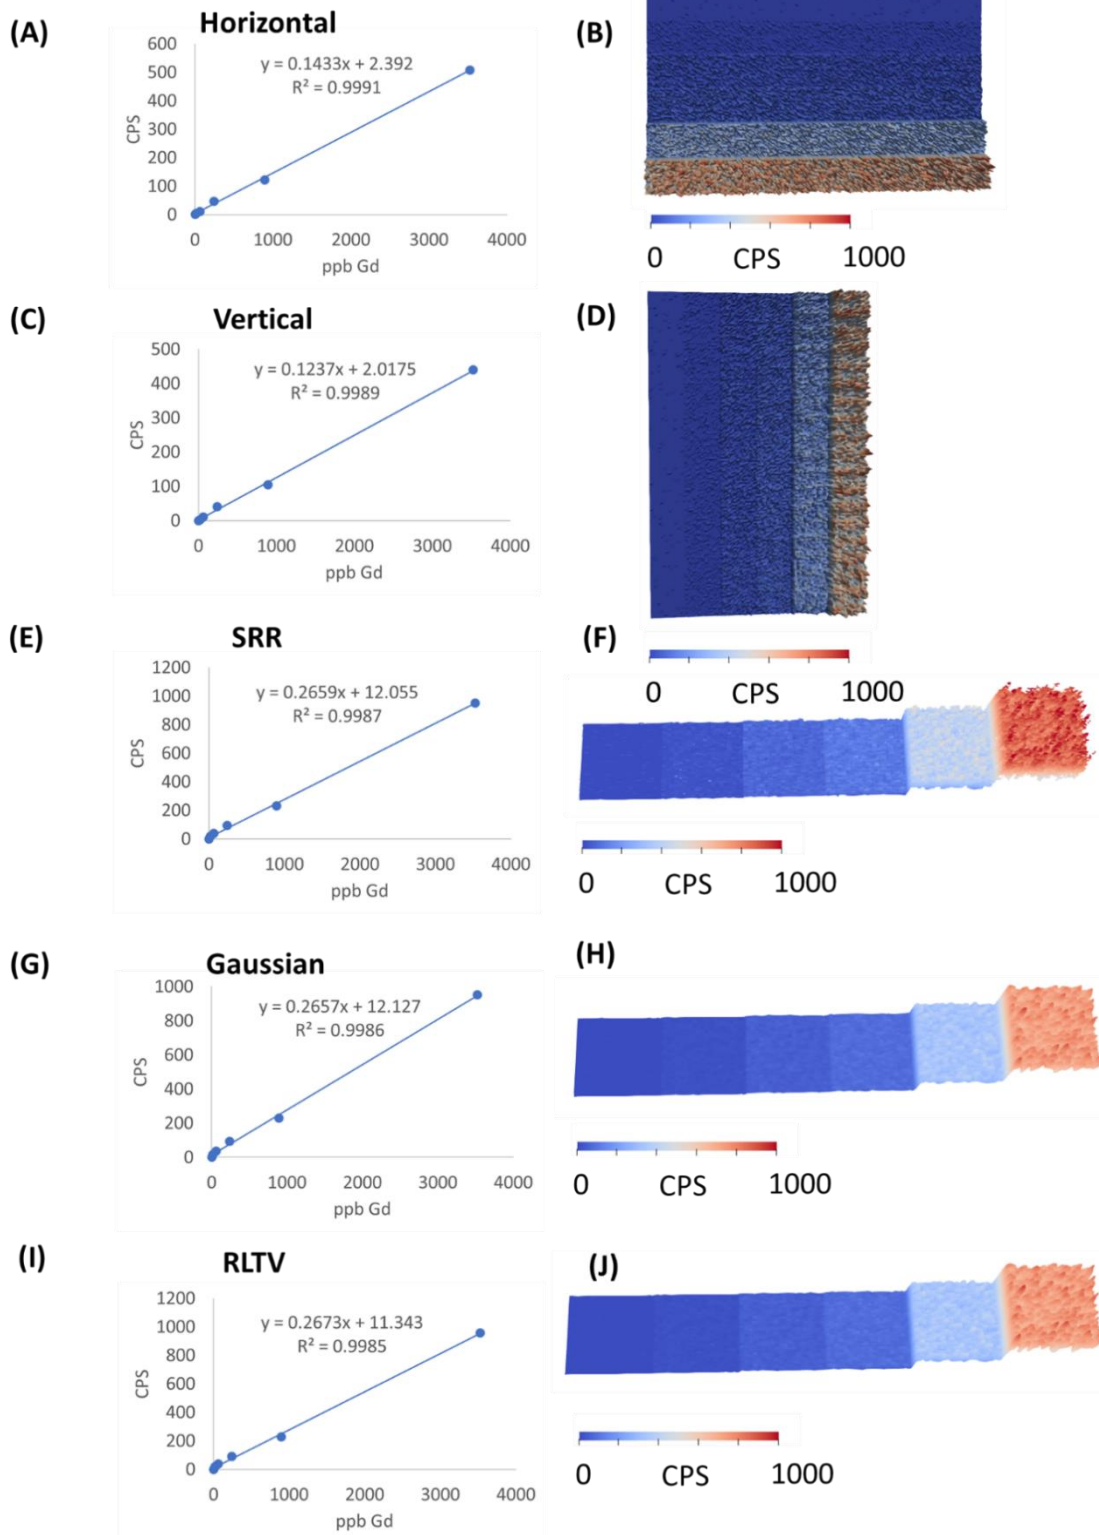

Figure S1: Representative calibration curves and image panels. (A) Anisotropic single layer calibration curve in horizontal direction. (B) Image of calibration standards in horizontal direction. (C) Anisotropic single layer calibration curve in vertical direction. (D) Image of calibration standards in vertical direction. (E) Calibration curve after SRR with AR = 2. (F) Image of calibration standards after SRR. (G) Calibration curve after application of the Gaussian filter. (H) Image of calibration standards after Gaussian filter. (I) Calibration curve after RLTV. (J) Image of calibration standards after RLTV.

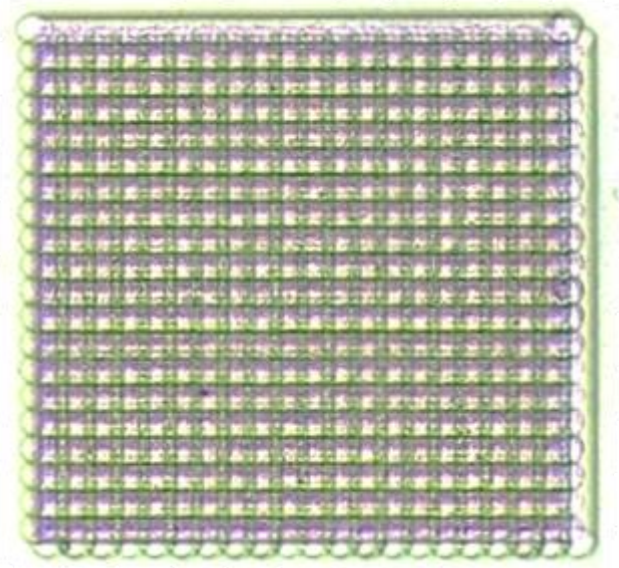

Figure S2: Post-ablation raster pattern after two passes in the horizontal and vertical directions.

**Two-layer test**  
AR 2 - 7.5  $\mu\text{m}$   
Speed 2x

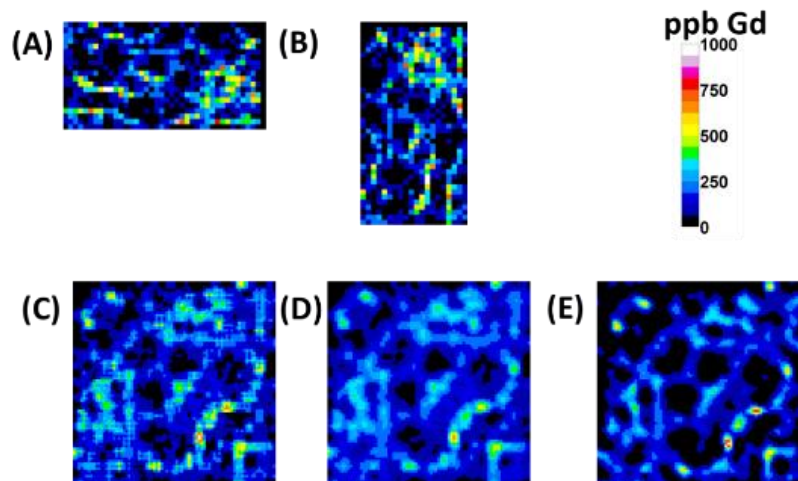

Figure S3: Effect of image processing on two-layer test. (A) Anisotropic acquisition of single layer in horizontal direction. (B) Same layer as (A), transposed to vertical direction. (C) SRR of (A) and (B). (D) Application of Gaussian filter. (E) RTLV image.
